# Supplementary material for: Metabolic side effects of antipsychotic drugs in individuals with schizophrenia during medium- to long-term treatment: protocol for a systematic review and network meta-analysis of randomized controlled trials
Source: Springer Nature journal article supplement (doi:10.1186/s13643-021-01760-z), 2021-08-02
Supplement: MOESM3 [file 19534150]

## List of Searches Resources

### ABS Database

**Host:** PC-TM Ltd.

**URL:** <http://nt-cmb.medun.acad.bg/absw/abs.htm>

**Geographical Coverage:** Bulgaria

**Dates Last Searched:** 2004 [We need volunteers to update this search]

**Time Coverage:** Unclear – Present

### Search Strategy:

Search option: Всички думи [all words]

#1 андом%

#2 двоино%

#3 сляпо%

#4 (клиничен% AND опит%)

#5 опит%

#6 random%

#7 alloc%

#8 assign%

#9 double-blind%

#10 placebo%

#11 (clinical% AND trial%)

#12 trial%

#13 or/1-12

### AFRIMS: Armed Forces Research Institute for Medical Sciences

**URL:** <http://www.afirms.org/frmsetlibrary.html>

**Geographical Coverage:** Thailand

**Dates Last Searched:** February 11, 2015 [Planned Annual Update]

**Time Coverage:** 1960 – Present

### Search Strategy:

#1 rando\$

#2 double and blin\$

#3 blin\$

#4 #2 and #3

#5 #1 and #4

### AFROLIB: World Health Organization Regional Office for Africa

**URL:** <http://afrolib.afro.who.int/cgi-bin/wxis.exe/iah/?IsisScript=iah/iah.xic&lang=I&base=afrolib>

**Geographical Coverage:** African Countries

**Dates Last Searched:** February 11, 2015 [Planned Annual Update]

**Time Coverage:** Unclear – Present

### Search Strategy:

random OR randomized OR randomised OR randomly OR randomisation OR randomization

blind OR blinding

trial OR trials

placebo OR placebos

### AIM (African Index Medicus): World Health Organization Regional Office for Africa

**URL:** <http://indexmedicus.afro.who.int/cgi-bin/wxis.exe/iah/?IsisScript=iah/iah.xis&lang=I&base=AIM>

**Geographical Coverage:** Africa

**Dates Last Searched:** February 11, 2015 [Planned Annual Update]

**Time Coverage:** Unclear – Present

### Search Strategy:

random OR randomized OR randomised OR randomly OR randomisation OR randomization

blind OR blinding

trial OR trials  
placebo OR placebos

**AL MANHAL**

**URL:** <http://www.almanhal.com>

**Geographical Coverage:** Arab and Islamic World

**Dates Last Searched:** February 11, 2015 [Planned Annual Update]

**Time Coverage:** Unclear – Present

**Search Strategy:**

schizophrenia [all subjects]

schizoaffective [all subjects]

psychosis [all subjects]

**AMED: Allied and Complementary Medicine Database**

**Host:** Ovid SP

**URL:** <http://ovidsp.ovid.com/>

**Geographical Coverage:** UK

**Dates Last Searched:** October 22, 2015 [Regular Monthly Updates]

**Time Coverage:** 1985 – Present

**Search Strategy:**

1. exp clinical trials/
2. exp randomized controlled trials/
3. exp double-blind method/
4. randomized controlled trial.pt.
5. clinical trial.pt.
6. controlled clinical trial.pt.
7. (clinic\$ adj4 trial\$.mp.
8. (random\$ adj5 (assign\$ or allocat\$ or assort\$)).mp.
9. (randomi\$ adj5 control\$ adj5 trial\$.mp.
10. (crossover or cross-over).mp.
11. ((singl\$ or doubl\$ or trebl\$ or tripl\$) adj (blind\$ or mask\$)).mp.
12. exp random allocation/
13. or/1-12
14. exp Dyskinesia, Drug-Induced/
15. exp Movement Disorders/
16. exp psychotic disorders/
17. exp schizophrenia/
18. schizo\$.mp.
19. hebephreni\$.mp.
20. hebephreni\$.mp.
21. oligophreni\$.mp.
22. psychotic\$.mp.
23. psychos#s.mp.
24. ((chronic\$ or sever\$) adj2 mental\$ adj2 (ill\$ or disorder\$)).mp.
25. (tardiv\$ adj dyskine\$.mp.
26. akathisi\$.mp.
27. (neuroleptic adj5 malignant adj2 syndrome).mp.
28. (movement adj5 (disorder or disorders)).mp.
29. neuroleptic-induc\$.mp.
30. parkinsoni\$.mp.
31. exp Parkinson Disease/
32. (parkinson?s adj disease).ti.
33. or/31-32
34. 30 not 33
35. or/14-29

36. 35 or 34  
37. 13 and 36

**ANZCTR: Australian New Zealand Clinical Trials Registry (ANZCTR)**

**Host:** WHO ICTRCP

**URL:** <http://www.who.int/trialsearch/>

**Geographical Coverage:** Australia and New Zealand

**Dates Last Searched:** October 22, 2015 [Regular Monthly Updates]

**Time Coverage:** 2009 – Present

**Search Strategy:**

See WHO ICTRCP

**BiblioMedica: Aggregate collection of relevant Czech National Medical Library databases**

**URL:** <http://www.medvik.cz/bmc/>

**Geographical Coverage:** Czech

**Dates Last Searched:** February 11, 2015 [Planned Annual Update]

**Time Coverage:** Unclear – Present

**Search Strategy:**

3. 1 and 2

2. "schiz\*" OR psychosis OR "psychotic\*" OR tardive OR akathisia OR parkinsonism OR "delusion"

1. "random\*" OR "placebo\*" OR "trial\*" OR "blind"

**Biological Abstracts**

**Host:** Web of Knowledge

**URL:** <http://isiknowledge.com/>

**Geographical Coverage:** Multi-National [Focused on English-Speaking World]

**Dates Last Searched:** October 22, 2015 [via BIOSIS Previews; Regular Monthly Updates]

**Time Coverage:** 1925 – Present

**Note:** The combination of Biological Abstracts/RRM and Biological Abstracts is BIOSIS Previews.

**Search Strategy:**

#1 CLIN\*

#2 TRIAL\*

#3 #1 near #2

#4 SINGL\*

#5 DOUBL\*

#6 TREBL\*

#7 TRIPL\*

#8 BLIND\*

#9 MASK\*

#10 (#4 or #5 or #6 or #7) near (#8 or #9)

#11 RANDOM\*

#12 RANDOM\*

#13 ALLOCAT\*

#14 ASSIGN\*

#15 #12 near (#13 or #14)

#16 CROSSOVER

#17 #16 or #15 or #11 or #10 or #3

#18 SCHIZO\*

#19 HEBEPHRENI\*

#20 OLIGOPHRENI\*

#21 PSYCHOTIC\*

#22 PSYCHOSIS

#23 PSYCHOSES

#24 CHRONIC\*

#25 SEVER\*  
 #26 MENTAL\*  
 #27 ILL\*  
 #28 DISORDER\*  
 #29 ((CHRONIC\* or SEVER\*) near2 MENTAL\*) near2 (ILL\* or DISORDER\*)  
 #30 #18 or #19 or #20 or #21 or #22 or #23 or #24  
 #31 TARDIV\*  
 #32 DYSKINE\*  
 #33 TARDIV\* near DYSKINE\*  
 #34 AKATHISI\*  
 #35 ACATHISI\*  
 #36 NEUROLEPTIC\*  
 #37 MALIGNANT  
 #38 SYNDROME  
 #39 NEUROLEPTIC\* and (MALIGNANT near2 SYNDROME)  
 #40 MOVEMENT  
 #41 DISORDER\*  
 #42 #36 and MOVEMENT and DISORDER\*  
 #43 PARKINSONI\*  
 #44 NEUROLEPTIC-INDUC\*  
 #45 PARKINSON'S  
 #46 DISEASE  
 #47 PARKINSON'S near1 (DISEASE in TI)  
 #48 #33 or #34 or #35 or #39 or #42 or #43 or #44  
 #49 #48 not #47  
 #50 #49 or #30

### BIOSIS Previews

**Host:** Web of Knowledge

**URL:** <http://isiknowledge.com/>

**Geographical Coverage:** Multi-National [Focused on English-Speaking World]

**Dates Last Searched:** October 22, 2015 [Regular Monthly Updates]

**Time Coverage:** 1969 – Present

### Search Strategy:

# 1 TS=schizo\* OR TI=schizo\* OR DS=schizo\*  
 # 2 TS=psychosis\* or TI=psychosis\* OR DS=psychosis\*  
 # 3 TS=psychotic\* or TI=psychotic\* OR DS=psychotic\*  
 # 4 TS=psychoses\* or TI=psychoses\* OR DS=psychoses\*  
 # 5 TS=oligophreni\* or TI=oligophreni\* OR DS=oligophreni\*  
 # 6 TS=hebephreni\* or TI=hebephreni\* OR DS=hebephreni\*  
 # 7 TS=tardiv\* OR TI=tardiv\* OR DS=tardiv\*  
 # 8 TS=dyskine\* OR TI=dyskine\* OR DS=dyskine\*  
 # 9 #8 AND #7  
 # 10 TS=akathisi\* OR TI=akathisi\* OR DS=akathisi\*  
 # 11 TS=acathisi\* OR TI=acathisi\* OR DS=acathisi\*  
 # 12 TS=neuroleptic malignant syndrome\* OR TI=neuroleptic malignant syndrome\* OR DS=neuroleptic malignant syndrome\*  
 # 13 TS=neuroleptic movement disorder\* OR TI=neuroleptic movement disorder\* OR DS=neuroleptic movement disorder\*  
 # 14 TS=severe mental illness\* OR TI=severe mental illness\* OR DS=severe mental illness\*  
 # 15 TS=chronic mental illness\* OR TI=chronic mental illness\* OR DS=chronic mental illness\*  
 # 16 TS=chronic mental disorder\* OR TI=chronic mental disorder\* OR DS=chronic mental disorder\*  
 # 17 TS=severe mental disorder\* OR TI=severe mental disorder\* or DS=severe mental disorder\*  
 # 18 TS=neuroleptic-induc\* OR TI=neuroleptic-induc\* OR DS=neuroleptic-induc\*  
 # 19 DS=parkinson's disease

# 20 #18 OR #17 OR #16 OR #15 OR #14 OR #13 OR #12 OR #11 OR #10 OR #9 OR #6 OR #5 OR #4 OR #3 OR #2 OR #1  
# 21 #20 NOT #19  
# 22 MQ=Randomized clinical trial\* OR DS=Randomized clinical trial\* OR TS=Randomized clinical trial\* OR TI=Randomized clinical trial\*  
# 23 DS=randomi\* OR TI=randomi\* OR TS=randomi\*  
# 24 DS=clin\* OR TI=clin\* OR TS=clin\*  
# 25 DS=trial\* OR TS=trial\* OR TI=trial\*  
# 26 #25 AND #24  
# 27 DS=(singl\* OR Doubl\* OR Tripl\* OR Trebl\*) OR TS=(singl\* OR Doubl\* OR Tripl\* OR Trebl\*) OR TI=(singl\* OR Doubl\* OR Tripl\* OR Trebl\*)  
# 28 DS=(mask\* OR blind\*) OR TS=(mask\* OR blind\*) OR TI=(mask\* OR blind\*)  
# 29 DS=crossover\* OR TS=crossover\* OR TI=crossover\*  
# 30 DS=(allocate\* OR assign\*) OR TS=(allocate\* OR assign\*) OR TI=(allocate\* OR assign\*)  
# 31 DS=random\* OR TS=random\* OR TI=random\*  
# 32 #31 AND #30  
# 33 #32 OR #29 OR #28 OR #27 OR #26 OR #23 OR #22  
# 34 #33 AND #21

**CAJ: China Academic Journals**

**Host:** East View Information Services

**URL:** [http://online.eastview.com/login\\_china/index.jsp](http://online.eastview.com/login_china/index.jsp)

**Geographical Coverage:** China

**Dates Last Searched:** January 31, 2015 [Regular Annual Updates]

**Time Coverage:** 2004 – Present

**Search Strategy:**

#1 Title: 精神分裂 and' 随机

#2 Keyword: 精神分裂 and' 随机

#3 Abstract: 精神分裂 and' 随机

**CBM: Chinese Biomedical Literature Database**

**Host:** Chongqing VIP Information Co.,Ltd

**URL:** <http://en.cqvip.com/>

**Geographical Coverage:** China

**Dates Last Searched:** January 31, 2015 [Regular Annual Updates]

**Time Coverage:** 1978 - Present

**Search Strategy:**

精神分裂 and' 随机

**Chiangmai University E-Research:** ฐานข้อมูลงานวิจัยอิเล็กทรอนิกส์

**URL:** [http://library.cmu.ac.th/digital\\_collection/eresearch/](http://library.cmu.ac.th/digital_collection/eresearch/)

**Geographical Coverage:** Thailand

**Dates Last Searched:** November 2008 [We need volunteers to update this search]

**Time Coverage:** Unclear – Present

**Search Strategy:**

Search option: In all fields

#1 randomi\*

#2 double blind

#3 สุ่ม

#4 #1 or #2 or #3

**Chiangmai University E-thesis:** ฐานข้อมูลวิทยานิพนธ์อิเล็กทรอนิกส์

**URL:** [http://library.cmu.ac.th/digital\\_collection/etheses/index.php](http://library.cmu.ac.th/digital_collection/etheses/index.php)

**Geographical Coverage:** Thailand

**Dates Last Searched:** November 2008 [We need volunteers to update this search]

**Time Coverage:** Unclear – Present

**Search Strategy:**

#1 randomi\*

#2 double blind

#3 สุ่ม

#4 #1 or #2 or #3

### **China VIP**

**URL:** <http://www.cqvip.com>

**Geographical Coverage:** China

**Dates Last Searched:** January 31, 2015 [Regular Annual Updates]

**Time Coverage:** 1989 – Present

**Search Strategy:**

精神分裂 and? 随机

### **China Wanfang**

**URL:** <http://www.wanfangdata.com>

**Geographical Coverage:** China

**Dates Last Searched:** January 31, 2015 [Regular Annual Updates]

**Time Coverage:** Unclear – Present

**Search Strategy:**

精神分裂 and? 随机

### **Chulalongkorn University: Chulalongkorn University Library Information Network**

**URL:** <http://library.car.chula.ac.th/>

**Geographical Coverage:** Thailand

**Dates Last Searched:** February 11, 2015 [Planned Annual Update]

**Time Coverage:** Unclear – Present

**Search Strategy:**

Search option: medical

#1 randomi\*\*

#2 double\*

#3 blind\*

#4 #2 and #3

#5 random\*

#6 allo\*

#7 assign\*

#8 #6 or #7

#9 #5 and #8

#10 สุ่ม

#11 เปรียบเทียบ

#12 #1 or #4 or #9 or #10 or #11

### **CINAHL: Current Index to Nursing and Allied Health Literature A**

**Host:** Ovid SP

**Geographical Coverage:** Multi-National

**Dates Last Searched:** 2006

**Time Coverage:** 1982 – Present

**Note:** This database is no longer available via Ovid SP and only is available via EBSCOhost.

**Search Strategy:**

1. pilot studies/

2. reproducibility of results/

3. exp clinical research/

4. exp clinical trials/
5. research methodology/
6. meta analysis/
7. crossover design/
8. patient selection/
9. random assignment/
10. sample size/
11. placebos/
12. comparative studies/
13. study design/
14. experimental studies/
15. community trials/
16. exp random sample/
17. research/
18. exp professional practice, research-based/
19. exp "outcomes (health care)"/
20. (research or clinical trial\$.)pt.
21. (practice guideline\$ or systematic review\$).pt.
22. nursing interventions.pt.
23. (Critical path or care plan or protocol).pt.
24. random\$.tw.
25. (Efficacy or effectiveness).tw.
26. ((double or single or triple) adj blind\$).tw.
27. placebo\$.tw.
28. (sham or mask\$).tw.
29. intention to treat.tw.
30. (control\$ adj2 trial\$).tw.
31. or/1-30

**CINAHL: Current Index to Nursing and Allied Health Literature B**

**Host:** EBSCO

**URL:** <http://search.ebscohost.com/>

**Geographical Coverage:** Multi-National

**Dates Last Searched:** October 22, 2015 [Regular Monthly Updates]

**Time Coverage:** 1982 – Present

**Search Strategy:**

S43 S41 and S42

S42 S37 or S38 or S39 or S40

S41 S1 or S2 or S3 or S4 or S5 or S14 or S15 or S16 or S19 or S20 or S21 or S22 or S26 or S30 or S31 or S32 or S33 or S34 or S35 or S36

S40 MW random\* or TI random\* or AB random\* or IN random\*

S39 MH triple-blind studies

S38 MH double-blind studies

S37 MH single-blind studies

S36 (MH "Neuroleptic Malignant Syndrome")

S35 (MH "Dyskinesia, Drug-Induced")

S34 (MH "Akathisia, Drug-Induced")

S33 (MH "Movement Disorders+")

S32 MW neuroleptic-induc\* or TI neuroleptic-induc\* or AB neuroleptic-induc\* or IN neuroleptic-induc\*

S31 MW parkinsoni\* or TI parkinsoni\* or AB parkinsoni\* or IN parkinsoni\*

S30 S22 and S29

S29 S27 and S28

S28 MW disorder or TI disorder or AB disorder or IN disorder

S27 MW movement or TI movement or AB movement or IN movement

S26 S22 and S25  
S25 S23 and S24  
S24 MW syndrome\* or TI syndrome\* or AB syndrome\* or IN syndrome\*  
S23 MW malignant\* or TI malignant\* or AB malignant\* or IN malignant\*  
S22 MW neuroleptic\* or TI neuroleptic\* or AB neuroleptic\* or IN neuroleptic\*  
S21 MW acathisi\* or TI acathisi\* or AB acathisi\* or IN acathisi\*  
S20 MW akathisi\* or TI akathisi\* or AB akathisi\* or IN akathisi\*  
S19 S17 and S18  
S18 MW dyskine\* or TI dyskine\*\* or AB dyskine\* or IN dyskine\*  
S17 MW tardiv\* or TI tardiv\* or AB tardiv\* or IN tardiv\*  
S16 MW hebephreni\* or TI hebephreni\* or AB hebephreni\* or IN hebephreni\*  
S15 MW oligophreni\* or TI oligophreni\* or AB oligophreni\* or IN oligophreni\*  
S14 S11 and S13  
S13 S8 or S12  
S12 S9 or S10  
S11 S6 or S7  
S10 MW disorder\* or TI disorder\* or AB disorder\* or IN disorder\*  
S9 MW ill\* or TI ill\* or AB ill\* or IN ill\*  
S8 MW mental\* or TI mental\* or AB mental\* or IN mental\*  
S7 MW sever\* or TI sever\* or AB sever\* or IN sever\*  
S6 MW chronic\* or TI chronic\* or AB chronic\* or IN chronic\*  
S5 MW psychoses\* or TI psychoses\* or AB psychoses\* or IN psychoses\*  
S4 MW psychotic\* or TI psychotic\* or AB psychotic\* or IN psychotic\*  
S3 MW psychosis or TI psychosis or AB psychosis or IN psychosis  
S2 MW schizo\* or TI schizo\* or AB schizo\* or IN schizo\*  
S1 (MH "Psychotic Disorders+")

### **ClinicalStudyResults.org**

**URL:** <http://www.clinicalstudyresults.org/home/>

**Geographical Coverage:** USA

**Dates Last Searched:** May 2011; February 11, 2015 [Inactive]

**Time Coverage:** Aug 2009 – May 2011

#### **Search Strategy:**

Search option: Studied indications or disease

- #1 Schizophrenia
- #2 Schizophrenia (adolescents)
- #3 Schizophrenia consta
- #4 Schizophrenia maintenance
- #5 Schizophrenia & schizoaffective disorder
- #6 Schizophrenia acute exacerbation
- #7 Schizophrenia bipolar disorder & psychotic disorder nos
- #8 Schizophrenia treatment resistant
- #9 Acute Schizophrenia
- #10 Agitation
- #11 Long-acting injection, Schizophrenia
- #12 Mania
- #13 Psychosis
- #14 Psychotic disorders
- #15 Schizoaffective disorder, schizophreniaform disorder

### **ClinicalTrials.gov**

**URL:** <http://clinicaltrials.gov/>

**Geographical Coverage:** Multi-National

**Dates Last Searched:** October 22, 2015 [Regular Monthly Updates]

**Time Coverage:** 2000 – Present



**Search Strategy:**

Tardive dyskinesia OR schizophrenia OR schizophreniform OR schizoaffective OR psychosis OR akathisia

Limit to interventional studies

**Counseling and Psychotherapy: Counseling and Psychotherapy Transcripts, Client Narratives, and Reference Works**

**URL:** <http://asp6new.alexanderstreet.com/psyc/psyc.index.map.aspx>

**Geographical Coverage:** USA

**Dates Last Searched:** July 14, 2009; October 22, 2015 [Inactive]

**Time Coverage:** Unknown

**Search Strategy:**

Search option:

Full text

Material Type=Session Transcript OR Client Narrative OR Reference OR Editorial

#1 randomi\*

#2 schizo\*

#3 #1 AND #2

**CRISP: Computer Retrieval of Information on Scientific Projects**

**URL:** <https://projectreporter.nih.gov/reporter.cfm>

**Geographical Coverage:** USA

**Dates Last Searched:** February 11, 2015 [Planned Annual Update]

**Time Coverage:** Unclear – Present

**Note:** CRISP has been replaced by RePORT Expenditures and Results (RePORTER)

**Search Strategy:**

Search option: ALL in other fields except research grants or projects

#1 schizophrenia

#2 randomized

#3 randomly

#4 #2 or #3

#5 #1 and #4

**CSA: CSA Sociological Abstracts**

**Host:** ProQuest

**URL:** <http://search.proquest.com/>

**Geographical Coverage:** Multi-National

**Dates Last Searched:** May 2007

**Time Coverage:** 1952 – Present

**Note:** CSA has been merged with ProQuest.

**Search Strategy:**

#1 psychoses

#2 catatonia

#3 chronic schizophrenia

#4 #1 or #2 or #3

#5 paranoid schizophrenia

#6 paraphrenia

#7 schizophreniform disorder

#8 parkinsoni\*

#9 neuroleptic-induc\*

#10 #8 and #9

#11 neuroleptic\*

#12 movement

#13 disorder\*

#14 #11 and #12 and #13

#15 malignant  
#16 #11 and #15  
#17 syndrome  
#18 #16 within 2 #17  
#19 chronic\*  
#20 sever\*  
#21 #19 or #20  
#22 mental\*  
#23 #21 within 2 #22  
#24 tardiv\*  
#25 dyskine\*  
#26 #24 within 2 #25  
#27 ill\*  
#28 disorder\*  
#29 schizo\*  
#30 hebephreni\*  
#31 oligophreni\*  
#32 psychotic\*  
#33 psychosis  
#34 psychoses  
#35 #4 or #5 or #6 or #7 or #10 or #14 or #18 or #23 or #26 or #27 or #28 or #29 or #30 or #31 or #32  
or #33 or #34  
#36 random\*  
#37 randomi?ed controlled trials  
#38 double\* blind\*  
#39 double\* blind\*  
#40 double blind studies  
#41 single\* near blind\*  
#42 #36 or #37 or #38 or #39 or #40 or #41  
#43 #35 and #42

**Current Controlled Trials (Now ISRCTN)**

**URL:** <http://www.isrctn.com/>

**Geographical Coverage:** USA and Europe

**Dates Last Searched:** October 22, 2015 [Regular Monthly Updates]

**Time Coverage:** 2000 – Present

**Search Strategy:**

#1 schizo%  
#2 psychosis  
#3 psychoses  
#4 psychotic  
#5 tardive dyskinesia  
#6 akathisia  
#7 #1 or #2 or #3 or #4 or #5 or #6

Search Strategy Since 2015:

Schizophrenia  
Schizotypal  
Schizoaffective  
Schizophreniform  
Psychosis  
Psychoses  
Psychotic  
Tardive Dyskinesia  
Akathisia

**Datastar PASCAL****Host:** Datastar [Now ProQuest Dialog]**URL:** <http://www.datastarweb.com>**Geographical Coverage:** Europe**Dates Last Searched:** May 20, 2005**Time Coverage:** 1973 – Present**Note:** The hosts for this database are ProQuest Dialog, Ovid SP, EBSCOhost and STN International.**Search Strategy:**

#1 randomi\$

#2 trial\$

#3 stud\$

#4 etud\$

#5 estud\$

#6 juicio\$

#7 #2 or #3 or #4 or #5 or #6

#8 #1 same #7

#9 randomized-allocation

#10 randomized-clinical-trial

#11 randomized-control

#12 randomized-control-trial

#13 randomized-controlled-trial

#14 rct-randomized-controlled-trials

#15 randomized-design

#16 randomized-evaluation

#17 randomized-experiment

#18 randomized-protocol

#19 randomized-study

#20 non-randomized-study-design

#21 randomized-trial

#22 randomizedcontrolled

#23 randomizedmulticenter

#24 randomizedparallel

#25 randomizedplacebo

#26 randomizedstudies

#27 randomizedto)

#28 #8 or #9 or #10 #11 or #12 or #13 or #14 or #15 or #16 or #17 or #18 or #19 or #20 or #21 or #22  
or #23 or #24 or #25 or #26 or #27

#29 crossover\$

#30 placebo\$

#31 aleatorizad\$

#32 double\$

#33 single\$

#34 triple\$

#35 #32 or #33 or #34

#36 blind\$

#37 #36 near #35

#38 insu

#39 #32 near #38

#40 doble

#41 ciego

#42 #40 near #41

#43 par chance\$

#44 par hazard\$

#45 #28 or #29 or #30 or #31 or #37 or #39 or #42 or #43 or #44

**Department of Mental Health Research****URL:** <http://www.dmh.go.th/>**Geographical Coverage:** Thailand**Dates Last Searched:** 2008 [We need volunteers to update this search]**Time Coverage:** Unclear – Present**Search Strategy:**

#1 randomized

#2 randomised

#3 double-blind

#4 สุ่ม

#5 #1 or #2 or #3 or #4

**EDINA BIOSIS-Web****URL:** <http://edina.ac.uk/>**Geographical Coverage:** Multi-National**Dates Last Searched:** 2002; 2006 [Inactive]**Time Coverage:** 1996 – 2006**Search Strategy:**

#1 SCHIZO\*

#2 PSYCHOSIS\*

#3 PSYCHOTIC\*

#4 PSYCHOSES

#5 OLIGOPHRENI\*

#6 HEBEPHRENI\*

#7 #1 or #2 or #3 or #4 or #5 or #6

**EMBASE****Host:** Ovid SP**URL:** <http://ovidsp.ovid.com>**Geographical Coverage:** Multi-National**Dates Last Searched:** October 21, 2015 [Regular Monthly Updates]**Time Coverage:** 1974 – Present**Search Strategy:**

1. (clin\$ adj2 trial).mp.

2. ((singl\$ or doubl\$ or trebl\$ or tripl\$) adj (blind\$ or mask\$)).mp.

3. (random\$ adj5 (assign\$ or allocat\$)).mp.

4. randomi\$.mp.

5. crossover.mp.

6. exp randomized-controlled-trial/

7. exp double-blind-procedure/

8. exp crossover-procedure/

9. exp single-blind-procedure/

10. exp randomization/

11. 1 or 2 or 3 or 4 or 5 or 6 or 7 or 8 or 9 or 10

12. (schizo\$ or psychotic\$ or psychosis or psychoses).mp.

13. ((chronic\$ or severe\$ or persistent\$) adj (mental\$ or psychological\$) adj (disorder\$ or ill\$)).mp.

14. exp schizophrenia/

15. exp psychosis/

16. mental patient/

17. (tardiv\$ adj dyskine\$).mp.

18. neuroleptic agent/

19. (neuroleptic\$ and (malignant adj2 syndrome)).mp.

20. tardive dyskinesia/

21. akathisia/

- 22. exp neuroleptic malignant syndrome/
- 23. (neuroleptic\$ and movement and disorder\$).mp.
- 24. parkinsoni\$.mp.
- 25. parkinson's.mp.
- 26. 12 or 13 or 14 or 15 or 16 or 17 or 18 or 19 or 20 or 21 or 22 or 23 or 24 or 25
- 27. 26 not parkinson's.ti.
- 28. 11 and 27

**Health Research Information Centre**

**Geographical Coverage:** Thailand

**Dates Last Searched:** November 2008; October 22, 2015 [Inactive]

**Time Coverage:** Unclear

**Search Strategy:**

Links to another database, where only the Department of Mental Health Research database can be accessed.

**Health Sciences E-index & Clipping: Health Sciences e-Index & Clipping, Naraesuan University**

**URL:** [http://mis.lib.nu.ac.th/med\\_index/](http://mis.lib.nu.ac.th/med_index/)

**Geographical Coverage:** Thailand

**Dates Last Searched:** November 2008 [We need volunteers to update this search]

**Time Coverage:** Unclear – Present

**Search Strategy:**

#1 randomized

#2 randomised

#3 double-blind

#4 สุ่ม

#5 เปรียบเทียบ

#6 #1 or #2 or #3 or #4 or #5

**Health Sciences E-Research, Naraesuan University**

**URL:** [http://mis.lib.nu.ac.th/med\\_research/](http://mis.lib.nu.ac.th/med_research/)

**Geographical Coverage:** Thailand

**Dates Last Searched:** November 2008 [We need volunteers to update this search]

**Time Coverage:** 1998

**Search Strategy:**

#1 randomized

#2 randomised

#3 double-blind

#4 สุ่ม

#5 #1 or #2 or #3 or #4

**Health System Research Institute Library:** ห้องสมุดสถาบันวิจัยระบบสาธารณสุข

**URL:** <http://library.hsri.or.th/en/database.php?>

**Geographical Coverage:** Thailand

**Dates Last Searched:** November 2008 [We need volunteers to update this search]

**Time Coverage:** Unclear

**Search Strategy:**

#1 randomi\$

#2 double blind

#3 double-blind

#4 สุ่ม

#5 #1 or #2 or #3 or #4

**HEED: Health Economic Evaluations Database**

**Host:** Wiley  
**URL:** <http://onlinelibrary.wiley.com/book/10.1002/9780470510933>  
**Geographical Coverage:** Multi-National  
**Dates Last Searched:** 2014; October 22, 2015 [Inactive]  
**Time Coverage:** Unclear - 2014  
**Search Strategy:**  
#1 schizo\*  
#2 random\*  
#3 #1 AND #2

**Health Research and Development Information Network (HERDIN)**

**URL:** <http://www.herdin.ph/>  
**Geographical Coverage:** Philippines  
**Dates Last Searched:** 1995 – Present [Planned Annual Update]  
**Time Coverage:** Unclear – Present  
**Search Strategy:**  
#1 random\$

**HERDIN biomedical bibliographic database**

**URL:** <http://www.herdin.ph/old/>  
**Geographical Coverage:** Philippines  
**Dates Last Searched:** August 2006; October 22, 2015 [Inactive]  
**Time Coverage:** 1966 – 2006  
**Search Strategy:**  
#1 random\$

**iKnowledge Digital Contents Management Centre SWU**

**URL:** <http://dclib.swu.ac.th/main.nsp?view=DCMS>  
**Geographical Coverage:** Thailand  
**Dates Last Searched:** November 2008; October 22, 2015 [Inactive]  
**Time Coverage:** Unclear  
**Search Strategy:**  
#1 randomi\*  
#2 double blin\*  
#3 random\*  
#4 alloc\*  
#5 #3 and #4  
#6 assign\*  
#7 #3 and #6  
#8 ฤๅ  
#9 #1 or #2 or #5 or #7 or #8

**iKnowledge Digital Contents Management Centre: Knowledge Digital Contents Management Centre Khon Kaen University**

**URL:** <http://dcmskku.kku.ac.th/dcms/main.nsp?view=DCMS>  
**Geographical Coverage:** Thailand  
**Dates Last Searched:** December 2008; October 22, 2015 [Inactive]  
**Time Coverage:** Unclear  
**Search Strategy:**  
#1 randomi\*  
#2 double blin\*  
#3 random\*  
#4 alloc\*  
#5 #3 and #4

#6 assign\*  
#7 #3 and #6  
#8  $\text{rs}$   
#9 #1 or #2 or #5 or #7 or #8

**IMSEAR: Index Medicus for South-East Asia Region**

**URL:** <http://library.searo.who.int/modules.php?op=modload&name=websis&file=imsear>

**Geographical Coverage:** South-East Asia

**Dates Last Searched:** 2006 [Planned Annual Update]

**Time Coverage:** Unclear – Present

**Search Strategy:**

Unclear

**IndMED**

**URL:** <http://indmed.nic.in/>

**Geographical Coverage:** India

**Dates Last Searched:** 2004 [Planned Annual Update]

**Time Coverage:** 1985 – Present

**Search Strategy:**

#1 randomi\$  
#2 random\$  
#3 alloc\$  
#4 assign\$  
#5 #3 or #4  
#6 #2 and #5  
#7double  
#8 blind\$  
#9 mask\$  
#10 #8 or #9  
#11 #7 and #10  
#12 crossover  
#13 placebo\$  
#14 #1 or #6 or #11 or #12 or #13

**International Pharmaceutical Abstracts**

**Host:** Ovid SP

**URL:** <http://ovidsp.ovid.com/>

**Geographical Coverage:** USA

**Dates Last Searched:** May 2010 [Planned Annual Update]

**Time Coverage:** 1970 – Present

**Search Strategy:**

#1 (clinic\$ adj2 trial).mp. [mp=title, subject heading word, registry word, abstract, trade name/generic name]  
#2 (random\$ adj5 control\$ adj5 trial\$.mp. [mp=title, subject heading word, registry word, abstract, trade name/generic name]  
#3 (crossover or cross-over).mp. [mp=title, subject heading word, registry word, abstract, trade name/generic name]  
#4 ((singl\$ or double\$ or trebl\$ or tripl\$) adj (blind\$ or mask\$)).mp. [mp=title, subject heading word, registry word, abstract, trade name/generic name]  
#5 randomi\$.mp. [mp=title, subject heading word, registry word, abstract, trade name/generic name]  
#6 (random\$ adj5 (assign\$ or allocat\$ or assort\$ or reciev\$)).mp. [mp=title, subject heading word, registry word, abstract, trade name/generic name]  
#7 1 or 2 or 3 or 4 or 5 or 6  
#8 schizo\$.mp. [mp=title, subject heading word, registry word, abstract, trade name/generic name]

- #9 hebephreni\$.mp. [mp=title, subject heading word, registry word, abstract, trade name/generic name]
- #10 oligophreni\$.mp. [mp=title, subject heading word, registry word, abstract, trade name/generic name]
- #11 psychotic\$.mp. [mp=title, subject heading word, registry word, abstract, trade name/generic name]
- #12 psychosis.mp. [mp=title, subject heading word, registry word, abstract, trade name/generic name]
- #13 psychoses.mp. [mp=title, subject heading word, registry word, abstract, trade name/generic name]
- #14 ((chronic\$ or sever\$) adj2 mental\$ adj2 (ill\$ or disorder\$)).mp. [mp=title, subject heading word, registry word, abstract, trade name/generic name]
- #15 (tardiv\$ adj dyskine\$).mp. [mp=title, subject heading word, registry word, abstract, trade name/generic name]
- #16 akathisi\$.mp. [mp=title, subject heading word, registry word, abstract, trade name/generic name]
- #17 acathisi\$.mp. [mp=title, subject heading word, registry word, abstract, trade name/generic name]
- #18 (neuroleptic\$ and (malignant adj2 syndrome)).mp. [mp=title, subject heading word, registry word, abstract, trade name/generic name]
- #19 (neuroleptic\$ and (movement and disorder\$)).mp. [mp=title, subject heading word, registry word, abstract, trade name/generic name]
- #20 parkinsoni\$.mp. [mp=title, subject heading word, registry word, abstract, trade name/generic name]
- #21 neuroleptic-induc\$.mp. [mp=title, subject heading word, registry word, abstract, trade name/generic name]
- #22 15 or 16 or 17 or 18 or 19 or 20 or 21
- #23 22 not (parkinson's adj1 disease).ti.
- #24 8 or 9 or 10 or 11 or 12 or 13 or 14
- #25 23 or 24
- #26 7 and 25

**IranMedex [Now Barakat Knowledge Network System]**

**URL:** <http://www.barakatkns.com/>

**Geographical Coverage:** Iran

**Dates Last Searched:** May 2015 [Planned Annual Update]

**Time Coverage:** 1966 – Present

**Search Strategy:**

- #1 randomised
- #2 randomized
- #3 "double blind"
- #4 allocated
- #5 randomly
- #6 #1 or #2 or #3 or #4 or #5
- #7 schizophrenia
- #8 schizophrenics
- #9 psychosis
- #10 #7 or #8 or #9
- #11 #6 and #10

**IRAN-ParsMed**

**URL:** <http://www.parsmed.com/>

**Geographical Coverage:** Iran

**Dates Last Searched:** 2005; October 22, 2015 [Inactive]

**Time Coverage:** 1995

**Search Strategy:**

Schizophrenia

**J-EAST**

**URL:** <http://sciencelinks.jp/j-east/>

**Geographical Coverage:** Japan



**Dates Last Searched:** 2004; October 22, 2015 [Inactive] [We need volunteers to update this search]

**Time Coverage:** Unclear – Present

**Search Strategy:**

#1 schizophrenia/KW

#2schizophrenia/TI

#3 #1 or #2

#4 blind/KW

#5 #3 and #4

**Khon Kaen University Library Catalogue**

**URL:** <http://kkulib.kku.ac.th/>

**Geographical Coverage:** Thailand

**Dates Last Searched:** November 2008 [We need volunteers to update this search]

**Time Coverage:** 1999 – Present

**Search Strategy:**

Two searches:

Search option: Books, periodicals, etc -

#1 randomi\*\*

#2 double

#3 blind\*

#4 #2 and #3

#5 random\*

#6 allo\*

#7 assign\*

#8 #6 or #7

#9 #5 and #8

#10 สุขุม

#11 เปรียบเทียบ

#12 #1 or #4 or #9 or #10 or #11

#13 #12 in search field medical

Search option: Thai journal index database:

#1 randomi\*\*

#2 double

#3 blind\*

#4 #2 and #3

#5 random\*

#6 allo\*

#7 assign\*

#8 #6 or #7

#9 #5 and #8

#10 สุขุม

#11 #1 or #4 or #9 or #10

#12 #11 in all language, all materials, all regions

**KoreaMED**

**URL:** <http://www.koreamed.org/>

**Geographical Coverage:** Korea

**Dates Last Searched:** July 2013

**Time Coverage:** 1990 – Present

**Search Strategy:**

#1 randomi\*

#2 double-blind\*

#3 "double blind"

#4 #1 or #2 or #3

## LILACS

### URL:

[http://bases.bireme.br/cgi-](http://bases.bireme.br/cgi-bin/wxislind.exe/iah/online/?IsisScript=iah/iah.xis&base=LILACS&lang=i)

[bin/wxislind.exe/iah/online/?IsisScript=iah/iah.xis&base=LILACS&lang=i](http://bases.bireme.br/cgi-bin/wxislind.exe/iah/online/?IsisScript=iah/iah.xis&base=LILACS&lang=i)

**Geographical Coverage:** Latin America and Caribbean Region

**Dates Last Searched:** 1996

**Time Coverage:** 1982 – Present

### Search Strategy:

#1 RANDOM\$

#2 ALEATORIS\$ or CASUAL or ACASO or AZAR

#3 ((DUPLO or DOBLE or SIMPLE or TRIPLA or TRIPLE) and (CEGO or CIEGO))

#4 ((DOUBL\$ or SINGL\$ or TRIPL\$ or TREBL\$) and (BLIND\$ or MASK\$))

#5 SINGLE-MASKED STUDY/

#6 DOUBLE-MASKED STUDY/

#7 PROPHYLATIC CONTROLLED TRIALS/

#8 PLACEBO\$ and CONTROL\$

#9 CLINICAL\$ and TRIALS\$

#10 #1 or #2 or #3 or #4 or #5 or #6 or #7 or #8 or #9

## LILACS 2010-ongoing

**Host:** BIREME

### URL:

[http://bases.bireme.br/cgi-](http://bases.bireme.br/cgi-bin/wxislind.exe/iah/online/?IsisScript=iah/iah.xis&base=LILACS&lang=i)

[bin/wxislind.exe/iah/online/?IsisScript=iah/iah.xis&base=LILACS&lang=i](http://bases.bireme.br/cgi-bin/wxislind.exe/iah/online/?IsisScript=iah/iah.xis&base=LILACS&lang=i)

**Geographical Coverage:** Latin America and Caribbean Region

**Dates Last Searched:** March 23, 2010 [Planned Annual Update]

**Time Coverage:** 1982 - Present

### Search Strategy:

#1 ((Pt RANDOMIZED CONTROLLED TRIAL OR Pt CONTROLLED CLINICAL TRIAL OR Mh RANDOMIZED CONTROLLED TRIALS OR Mh RANDOM ALLOCATION OR Mh DOUBLE-BLIND METHOD OR Mh SINGLE-BLIND METHOD OR Pt MULTICENTER STUDY) OR ((tw ensaio or tw ensayo or tw trial) and (tw azar or tw acaso or tw placebo or tw control\$ or tw aleat\$ or tw random\$ or (tw duplo and tw cego) or (tw doble and tw ciego) or (tw double and tw blind)) and tw clinic\$)) AND NOT ((CT ANIMALS OR MH ANIMALS OR CT RABBITS OR CT MICE OR MH RATS OR MH PRIMATES OR MH DOGS OR MH RABBITS OR MH SWINE) AND NOT (CT HUMAN AND CT ANIMALS)) [Words] and schizo\$ [Words]

#2 ((Pt ENSAYO CONTROLADO ALEATORIO OR Pt ENSAYO CLINICO CONTROLADO OR Mh ENSAYOS CONTROLADOS ALEATORIOS OR Mh DISTRIBUCIÓN ALEATORIA OR Mh METODO DOBLE CIEGO OR Mh METODO SIMPLICIEGO OR Pt ESTUDIO MULTICÉNTRICO) or ((tw ensaio or tw ensayo or tw trial) and (tw azar or tw acaso or tw placebo or tw control\$ or tw aleat\$ or tw random\$ or (tw duplo and tw cego) or (tw doble and tw ciego) or (tw double and tw blind)) and tw clinic\$)) AND NOT ((Ct ANIMALES OR Mh ANIMALES OR Ct CONEJOS OR Ct RATÓN OR MH Ratas OR MH Primates OR MH Perros OR MH Conejos OR MH Porcinos) AND NOT (Ct HUMANO AND Ct ANIMALES)) [Palabras] and Esquizofrenia or Schizo\$ or F03.700.750 [Palabras]

# 3((Pt ENSAIO CONTROLADO ALEATORIO OR Pt ENSAIO CLINICO CONTROLADO OR Mh ENSAIOS CONTROLADOS ALEATORIOS OR Mh DISTRIBUICAO ALEATORIA OR Mh MÉTODO DUPLO-CEGO OR Mh MÉTODO SIMPLS-CEGO or PT ESTUDO MULTICENTRICO) or ((tw ensaio or tw ensayo or tw trial) and (tw azar or tw acaso or tw placebo or tw control\$ or tw aleat\$ or tw random\$ or (tw duplo and tw cego) or (tw doble and tw ciego) or (tw double and tw blind)) and tw clinic\$)) AND NOT ((Ct ANIMAIS OR ct coelhos or ct camundongos or MH ANIMAIS OR MH RATOS OR MH PRIMATAS OR MH CAES OR MH COELHOS OR MH SUINOS) AND NOT (Ct HUMANO AND Ct ANIMAIS)) [Palavras] and Esquizofrenia or Schizo\$ or F03.700.750 [Palavras]

#4 #1 AND #2 AND #3

**Lilly Clinical Trial Registry**

**URL:** <http://www.lillytrials.com/>

**Geographical Coverage:** Multi-National

**Dates Last Searched:** 2006

**Time Coverage:** Unclear – Present

**Note:** No longer searching as site redirects clinicaltrials.gov

**Search Strategy:**

See ClinicalTrials.gov

**Lundbeck Trials**

**URL:** <http://www.lundbecktrials.com/>

**Geographical Coverage:** Multi-National

**Dates Last Searched:** October 2010

**Time Coverage:** Unclear – Present

**Search Strategy:**

No search facility available

**Magyar Orvosi Bibliográfia**

**URL:** [http://www.eski.hu/index\\_en.html](http://www.eski.hu/index_en.html)

**Geographical Coverage:** Hungary

**Dates Last Searched:** 2004 [Planned Annual Update]

**Time Coverage:** 1989 – Present

**Search Strategy:**

#1 kontrollált vizsgálat

#2 controlled trial

#3 kontrollált tanulmány

#4 controlled study

#5 randomizált vizsgálat

#6 randomised trial

#7 randomized trial

#8 randomizált kontrollált vizsgálat

#9 randomised (or randomized) controlled trial

#10 randomized controlled trial

#11 randomizált kontrollált tanulmány

#12 randomised controlled study

#13 randomized controlled study

#14 véletlen besorolásos kontrollált vizsgálat

#15 controlled trial with random assignment

#16 véletlen besorolásos vizsgálat

#17 trial with random assignment

#18 véletlen besorolásos tanulmány

#19 study with random assignment

#20 véletlen besorolásos kontrollált tanulmány

#21 controlled study with random assignment

#22 Randomizál

#23 randomizes

#24 #1 or #2 or #3 or #4 or #5 or #6 or #7 or #8 or #9 or #10 or #11 or #12 or #13 or #14 or #15 or #16 or #17 or #18 or #19 or #20 or #21 or #22 or #23

**Mahidol University Library and Information Centre:** สำนักหอสมุด มหาวิทยาลัยมหิดล

**URL:** <http://www.li.mahidol.ac.th/>

**Geographical Coverage:** Thailand

**Dates Last Searched:** November 2008 [We need volunteers to update this search]

**Time Coverage:** Unclear – Present

**Search Strategy:**

- #1 randomi\*
- #2 double blind\*
- #3 random\*
- #4 alloc\*
- #5 assign\*
- #6 #4 or #5
- #7 #3 and #6
- #8  $\text{R}^{\text{N}}$
- #9 #1 or #2 or #7 or #8

## MEDIC

**URL:** <http://www.terkko.helsinki.fi/medic/>

**Geographical Coverage:** Finland

**Dates Last Searched:** 2004 [Planned Annual Update]

**Time Coverage:** Unclear – Present

**Search Strategy:**

Unclear

## MEDLINE

**Host:** Ovid SP

**Geographical Coverage:** Multi-National [Focused on English-Speaking World]

**URL:** <http://ovidsp.ovid.com/>

**Dates Last Searched:** October 22, 2015 [Regular Monthly Updates]

**Time Coverage:** 1946 – Present

**Search Strategy:**

1. exp clinical trials/
2. exp randomized controlled trials/
3. exp double-blind method/
4. exp single-blind method/
5. exp cross-over studies/
6. randomized controlled trial.pt.
7. clinical trial.pt.
8. controlled clinical trial.pt.
9. (clinic\$ adj2 trial).mp.
10. (random\$ adj5 control\$ adj5 trial\$.mp.
11. (crossover or cross-over).mp.
12. ((singl\$ or double\$ or trebl\$ or tripl\$) adj (blind\$ or mask\$)).mp.
13. randomi\$.mp.
14. (random\$ adj5 (assign\$ or allocat\$ or assort\$ or reciev\$)).mp.
15. or/1-14
16. exp SCHIZOPHRENIA/
17. exp Paranoid Disorders/
18. schizo\$.mp.
19. hebephreni\$.mp.
20. oligophreni\$.mp.
21. psychotic\$.mp.
22. psychosis.mp.
23. psychoses.mp.
24. ((chronic\$ or sever\$) adj2 mental\$ adj2 (ill\$ or disorder\$)).mp.
25. exp dyskinesia, drug-induced/
26. exp psychomotor agitation/
27. exp neuroleptic malignant syndrome/
28. exp "diagnosis, dual (psychiatry)"/
29. (tardiv\$ adj dyskine\$.mp.

- 30. akathisi\$.mp.
- 31. acathisi\$.mp.
- 32. (neuroleptic\$ and (malignant adj2 syndrome)).mp.
- 33. (neuroleptic\$ and (movement and disorder\$)).mp.
- 34. parkinsoni\$.mp.
- 35. neuroleptic-induc\$.mp.
- 36. or/29-35
- 37. 36 not (parkinson's adj1 disease).ti.
- 38. or/16-28
- 39. 37 or 38
- 40. 15 and 39

**Mental Health & Psychiatric Nursing Abstract:** ฐานข้อมูลวิจัยทางสุขภาพจิตและจิตเวช

**URL:** <http://www.dmh.moph.go.th/abstract/nurse.asp>

**Geographical Coverage:** Thailand

**Dates Last Searched:** November 2008 [We need volunteers to update this search]

**Time Coverage:** Unclear – Present

**Search Strategy:**

- #1 randomi
- #2 double-blind
- #3 สุ่ม
- #4 เปรียบเทียบ
- #5 #1 or #2 or #3 or #4

**Mental Health and Psychiatric Abstract Database**

**URL:** <http://www.dmh.moph.go.th/abstract/>

**Geographical Coverage:** Thailand

**Dates Last Searched:** November 2008 [We need volunteers to update this search]

**Time Coverage:** Unclear – Present

**Search Strategy:**

- #1 randomi
- #2 random
- #3 double-blind
- #4 สุ่ม
- #5 #1 or #2 or #3 or #4

**Midwifery and Infant Care: Maternity and Infant Care**

**URL:** <http://arc.uk.ovid.com/>

**Dates Last Searched:** May 2006; October 22, 2015 [Inactive]

**Time Coverage:** Unclear

**Search Strategy:**

- #1 random\*
- #2 clinical trial\*
- #3 double?blind\*
- #4 trial\*
- #5 #1 or #2 or #3 or #4
- #6 dyskines\*
- #7 a?athisia
- #8 neuroleptic malignant syndrom\*
- #9 schizo\*
- #10 psychotic\*
- #11 psychos?s
- #12 #6 or #7 or #8 or #9 or #10 or #11
- #13 #5 and #12

**National Alliance for Research: National Alliance for Research on Schizophrenia and Depression**

**URL:** <http://www.mhsource.com/narsad/bd/studyops.html>

**Geographical Coverage:** USA

**Dates Last Searched:** February 2001; October 22, 2015 [Inactive]

**Time Coverage:** Unclear

**Search Strategy:**

#1 schiz\*

**National Institutes of Health**

**URL:** <http://www.nih.gov/>

**Geographical Coverage:** USA

**Dates Last Searched:** 2006

**Time Coverage:** Unclear

**Search Strategy:**

#1 schiz\*

#2 randomi\*

#3 #1 and #2

**National Research Council of Thailand Library:** ห้องสมุดงานวิจัย สำนักงานคณะกรรมการการวิจัยแห่งชาติ

**URL:** [http://www.riclib.nrct.go.th/index\\_e.html](http://www.riclib.nrct.go.th/index_e.html)

**Geographical Coverage:** Thailand

**Dates Last Searched:** November 2008 [We need volunteers to update this search]

**Time Coverage:** Unclear – Present

**Search Strategy:**

#1 randomi\$

#2 double-blind

#3 สุ่ม

#4 เปรียบเทียบ

#5 #1 or #2 or #3 or #4

**National Research Register**

**Geographical Coverage:** UK

**Dates Last Searched:** March 2001; October 22, 2015 [Inactive]

**Time Coverage:** Unclear

**Note:** The UK National Research Register is an archived site and is no longer being updated.

**Search Strategy:**

#1 randomi\*

#2 double\*

#3 #1 or #2

#4 schiz\*

#5 psychoses

#6 psychosis

#7 psychotic\*

#8 #4 or #5 or #6 or #7

#9 #3 and #8

**National Technical Information Service**

**URL:** <http://www.ntis.gov/search/index.aspx>

**Geographical Coverage:** USA

**Dates Last Searched:** May 2010 [Planned Annual Update]

**Time Coverage:** Unclear – Present

**Search Strategy:**

Search option: title  
#1 Schizophrenia

**Office of Research Development, PCM & PKH:** สำนักงานพัฒนางานวิจัย

วิทยาลัยแพทยศาสตร์พระมงกุฎเกล้า/โรงพยาบาลพระมงกุฎเกล้า

**URL:** <http://research.pcm.ac.th/research/datatitle.php>

**Geographical Coverage:** Thailand

**Dates Last Searched:** November 2008; October 22, 2015 [Inactive]

**Time Coverage:** Unclear

**Search Strategy:**

- #1 randomized
- #2 double blind
- #3 #1 or #2
- #4 #3 in English title field
- #5 randomized
- #6 double blind
- #7 a Thai term
- #8 #5 or #6 or #7
- #9 #8 in Thai title field
- #10 #4 and #9

**Panteleimon: Medical and biological databases**

**URL:** <http://www.panteleimon.org/>

**Geographical Coverage:** Ukraine

**Dates Last Searched:** August 25, 2004 [Planned Annual Update]

**Time Coverage:** Unclear – Present

**Search Strategy:**

Search option: Abstract, title, article, keyword:

- #1 randomi
- #2 double-blind
- #3 allocate
- #4 assign
- #5 clinical trial
- #6 placebo
- #7 crossover
- #8 Рандомиз
- #9 двойного слепого
- #10 распределить
- #11 определить
- #12 клиническое исследование
- #13 плацебо
- #14 скрестить
- #15 перекрест
- #16 Рандомиз
- #17 ДВОЇСТИЙ СЛІПІЙ
- #18 РОЗПОДІЛИТИ
- #19 ВИЗНАЧИТИ
- #20 КЛІНІЧНА ДОСЛІДЖЕННЯ
- #21 плацебо
- #22 СХРЕСТИТИ
- #23 ПЕРЕХРЕСТ
- #24 #1 or #2 or #3 or #4 or #5 or #6 or #7 or #8 or #9 or #10 or #11 or #12 or #13 or #14 or #15 or #16 or #17 or #18 or #19 or #20 or #21 or #22 or #23

**POPLINE****Host:** K4Health project**URL:** <http://www.popline.org/>**Geographical Coverage:** USA**Dates Last Searched:** November 01, 2010 [Planned Annual Update]**Time Coverage:** 1973 – Present**Search Strategy:**

Schizo\* / psychosis / psychoses / psychotic / tardive dyskinesia / akathisia

**Prince of Songkla E-Research Database****URL:** <http://kb.psu.ac.th/psukb/>**Geographical Coverage:** Thailand**Dates Last Searched:** November 2008 [Planned Annual Update]**Time Coverage:** Unclear**Search Strategy:**

#1 randomised

#2 randomized

#3 double blind

#4 ฤๅ

#5 #1 or #2 or #3 or #4

**PsycEXTRA****URL:** <http://psycnet.apa.org/index.cfm?fa=search.advancedSearchForm>**Geographical Coverage:** Multi-National**Dates Last Searched:** February 25, 2008 [Planned Annual Update]**Time Coverage:** 1908 – Present**Search Strategy:**

1 exp clinical trials/ or experimental design/ (443)

2 exp treatment effectiveness evaluation/ (404)

3 exp mental health program evaluation/ (38)

4 exp random sampling/ (2)

5 randomi\$.mp. (450)

6 (clinic\$ adj4 trial\$.mp. (764)

7 (random\$ adj5 (assign\$ or allocat\$ or assort\$)).mp. (266)

8 (crossover or cross-over).mp. (31)

9 ((singl\$ or doubl\$ or tripl\$ or trebl\$) adj (blind\$ or mask\$)).mp. (86)

10 exp placebo/ (43)

11 placebo\$.mp. (273)

12 1 or 2 or 3 or 4 or 5 or 6 or 7 or 8 or 9 or 10 or 11 (1993)

13 exp psychosis/ (567)

14 exp schizophrenia/ (469)

15 exp schizoaffective disorder/ (21)

16 exp dyskinesia/ (6)

17 exp movement disorders/ (116)

18 exp akathisia/ (0)

19 exp neuroleptic malignant syndrome/ (0)

20 exp parkinsonism/ (2)

21 schizo\$.mp. (694)

22 hebephreni\$.mp. (1)

23 oligophreni\$.mp. (0)

24 psychotic\$.mp. (168)

25 psychos#s\$.mp. (209)

26 ((chronic\$ or sever\$) adj2 mental\$ adj2 (ill\$ or disorder\$)).mp. (236)

27 (tardiv\$ adj dyskine\$).mp. (11)



28 (akathisi\$ or acathisi\$.mp. (1)  
29 (neuroleptic\$ adj4 malignan\$ adj4 syndrom\$.mp. (2)  
30 (movement adj5 disorder\$.mp. (27)  
31 parkinsoni\$.mp. (12)  
32 neuroleptic-induc\$.mp. (1)  
33 (parkinson?s adj disease).ti. (48)  
34 13 or 14 or 15 or 21 or 22 or 23 or 24 or 25 or 26 (1131)  
35 16 or 17 or 18 or 19 or 20 or 27 or 28 or 29 or 30 or 31 or 32 (141)  
36 35 not 33 (139)  
37 34 or 36 (1258)  
38 12 and 37 (45)  
39 from 38 keep 1-45 (45)

### **Psychiatry**

**URL:** <http://www.psikiyatridizini.org/>

**Geographical Coverage:** Turkey

**Dates Last Searched:** June 2006 [Planned Annual Update]

**Time Coverage:** 1968

#### **Search Strategy:**

#1 Randomi  
#2 allocated  
#3 double blind  
#4 double-blind  
#5 #1 or #2 or #3 or #4

### **PsycINFO**

**Host:** Ovid SP

**URL:** <http://www.apa.org/psycinfo/>

**Geographical Coverage:** Multi-National

**Dates Last Searched:** October 22, 2015 [Regular Monthly Updates]

**Time Coverage:** 1806 – Present

#### **Search Strategy:**

1. randomi\$.mp.  
2. ((singl\$ or doubl\$ or trebl\$ or tripl\$) adj (blind\$ or mask\$)).mp.  
3. placebo\$.mp.  
4. exp placebo/  
5. crossover.mp.  
6. exp treatment effectiveness evaluation/  
7. exp mental health program evaluation/  
8. (random\$ adj (assign\$ or allocate\$)).mp.  
9. or/1-8  
10. schizo\$.mp.  
11. hebephreni\$.mp.  
12. oligophreni\$.mp.  
13. psychotic\$.mp.  
14. psychosis.mp.  
15. psychoses.mp.  
16. ((chronic\$ or sever\$) adj2 mental\$ adj2 (ill\$ or disorder\$)).mp.  
17. exp psychosis/  
18. exp schizophrenia/  
19. exp schizoaffective disorder/  
20. (tardiv\$ adj dyskine\$.mp.  
21. akathisi\$.mp.  
22. acathisi\$.mp.  
23. (neuroleptic\$ and (malignant adj2 syndrome)).mp.

24. (neuroleptic\$ and (movement and disorder\$)).mp.
25. exp neuroleptic malignant syndrome/
26. exp dyskinesia/
27. exp tardive dyskinesia/
28. exp akathisia/
29. neuroleptic-induc\$.mp.
30. parkinsoni\$.mp.
31. parkinsonism-.sh.
32. (parkinson's adj1 disease).ti.
33. or/10-31
34. 33 not 32
35. 9 and 34

## **PsycLIT**

**Geographical Coverage:** USA

**Dates Last Searched:** 1996; October 22, 2015 [Inactive]

**Time Coverage:** 1974

**Note:** It was merged into the PsycINFO online database in 2000.

### **Search Strategy:**

Trial search phrase:

- #1 randomi\*
  - #2 singl\*
  - #3 doubl\*
  - #4 trebl\*
  - #5 tripl\*
  - #6 blind\*
  - #7 mask\*
  - #8 (#2 or #3 or #4 or #5) near (#6 or #7)
  - #9 clin\*
  - #10 trial\*
  - #11 #9 near #10
  - #12 placebo\*
  - #13 placebo- in de
  - #14 crossover
  - #15 treatment-effectiveness-evaluation in de
  - #16 mental-health-program-evaluation in de
  - #17 random\*
  - #18 assign\*
  - #19 allocate\*
  - #20 #17 near (#18 or #19)
  - #21 #20 or #16 or #15 or #14 or #13 or #12 or #11 or #8 or #1
- schizophrenia search phrase:
- #1 schizo\*
  - #2 hebephreni\*
  - #3 oligophreni\*
  - #4 psychotic\*
  - #5 psychosis
  - #6 psychoses
  - #7 chronic\*
  - #8 sever\*
  - #9 mental\*
  - #10 ill\*
  - #11 disorder\*
  - #12 ((chronic\* or sever\*) near2 mental\*) near2 (ill\* or disorder\*)
  - #13 explode "schizophrenia"

#14 explode "psychosis"  
 #15 explode "schizoaffective-disorder"  
 #16 #1 or #2 or #3 or #4 or #5 or #6 or #12 or #13 or #14 or #15  
 #17 tardiv\*  
 #18 dyskine\*  
 #19 tardiv\* near dyskine\*  
 #20 akathisi\*  
 #21 acathisi\*  
 #22 neuroleptic\*  
 #23 malignant  
 #24 syndrome  
 #25 neuroleptic\* and (malignant near2 syndrome)  
 #26 movement  
 #27 disorder\*  
 #28 #22 and movement and disorder\*  
 #29 parkinsoni\*  
 #30 neuroleptic-induc\*  
 #31 parkinson's  
 #32 disease  
 #33 parkinson's near1 (disease in ti)  
 #34 #19 or #20 or #21 or #25 or #28 or #29 or #30  
 #35 #34 not #33  
 #36 "neuroleptic-malignant-syndrome" in de  
 #37 explode "dyskinesia"  
 #38 explode "akathisia"  
 #39 "parkinsonism-" in de  
 #40 #35 or #36 or #37 or #38 or #39  
 #41 #40 or #16  
 (Journal Articles 1/1974 - 12/1996; Chapters and Books 1/1987 - 12/1996)

## PSYINDEX

**Geographical Coverage:** Germany, Switzerland, Austria

**Dates Last Searched:** September 2009 [Planned Annual Update]

**Time Coverage:** 1977 – Unclear

### Search Strategy:

#1 random\* and (allocat\* or assign\* or zugewiesen or zugeteilt or eingeteilt) and (UD=199501-200204)  
 #2 (randomi\* or zufall\* or zufaell\*) and (UD=199501-200204)  
 #3 ((doubl\* or doppel\* or singl\* or einfach\* or tripl\* or trebl\* or dreifach\*) near (blind\* or mask\*)) and (UD=199501-200204)  
 #4 pla?ebo\* and (treat\* or behand\* or untersuch\*) and (UD=199501-200204)  
 #5 (doppelblind\* or verblind\*) and (UD=199501-200204)  
 #6 (pla?ebo\* near ((vs or versus or gegen) or verum)) and (UD=199501-200204) and (UD=199501-200204)  
 #7 (zufa?ll\* or random\*) and (experiment\* or evalu\* or effe?t\* or wirk\* ) and (behand\* or untersuch\* or treat\*) and (UD=199501-200204)  
 #8 (allocat\* or assign\* or zugewiesen or zugeteilt or eingeteilt) and (control group\* or kontrollgruppe\* or beobachtungsgruppe\*) and (UD=199501-200204)  
 #9 random\* and (controll\* or kontroll\*) and (studie\* or trial\*) and (UD=199501-200204)  
 #10 #1 or #2 or #3 or #4 or #5 or #6 or #7 or #8 or #9  
 #11 random\* and (controll\* or kontroll\*) and (UD=199501-200204) and (UD=199501-200204)  
 #12 #1 or #2 or #3 or #4 or #5 or #6 or #7 or #8 or #11

## PubMed

**URL:** <http://www.ncbi.nlm.nih.gov/pubmed>

**Geographical Coverage:** Multi-National [Focused on English-Speaking World]

**Dates Last Searched:** October 22, 2015 [Regular Monthly Updates]

**Time Coverage:** 1946 – Present

**Search Strategy:**

1# schizophrenia[MeSH Terms]  
2# paranoid disorders[MeSH Terms]  
3# dyskinesia, drug -induced[MeSH Terms]  
4# psychomotor agitation[MeSH Terms]  
5# diagnosis, dual psychiatry[MeSH Terms]  
6# psychotic disorders[MeSH Terms]  
7# akathisia drug induced[All Fields]  
8# neuroleptic malignant syndrome[MeSH Terms]  
9# #1 OR #2 OR #3 OR #4 OR #8 OR #9 OR #10 OR #11  
10# hebephreni\*  
11# oligophreni\*  
12# psychotic\*  
13# psychosis  
14# psychoses  
15# akathisi\*  
16# acathisi\*  
17# parkinsoni\*  
18# neuroleptic-induc\*  
19# #10 OR #11 OR #12 OR #13 OR #14 OR #15 OR #16 OR #17 OR #18  
20# tardiv\*  
21# dyskine\*  
22# #23 AND #24  
23# neuroleptic\*  
24# malignant  
25# syndrome  
26# #23 AND #24  
27# #26 and #25  
28# movement\*  
29# #23 and #28  
30# disorder\*  
31# #29 and #30  
32# #9 OR #19 OR #22 OR #27 OR #31  
33# parkinson's disease [ti]  
34# parkinson disease [ti]  
35# #35 OR #34  
36# #32 NOT #35  
37# randomized controlled trial [pt]  
38# controlled clinical trial [pt]  
39# randomized [tiab]  
40# placebo [tiab]  
41# drug therapy [sh]  
42# randomly [tiab]  
43# trial [tiab]  
44# groups [tiab]  
45# #37 OR #38 OR #39 OR #40 OR #41 OR #42 OR #43 OR #44  
46# humans [mh]  
47# #45 AND #46  
48# #36 AND #47

**Russian Medical Journal Search**

**URL:** <http://www.rmj.ru/main.htm>

**Geographical Coverage:** Russia

**Dates Last Searched:** October 01, 2004 [We need volunteers to update this search]

**Time Coverage:** 1995 – Present

**Search Strategy:**

#1 Рандомиз

#2 двойно слепо

#3 плацебо

#4 клиническое исследование

#5 определить

#6 распределить

#7 Распредел\*

#8 скрестить

#9 Перекрест\*

#10 #1 or #2 or #3 or #4 or #5 or #6 or #7 or #8 or #9

**RUSSMED**

**URL:** <http://www.russmed.ru/eng/ramn.htm>

**Geographical Coverage:** Russia

**Dates Last Searched:** 1999 [We need volunteers to update this search]

**Time Coverage:** 1960 – Present

**Search Strategy:**

Unclear

**SIGLE [Now OpenSIGLE and OpenGrey]**

**URL:** <http://www.opengrey.eu/>

**Geographical Coverage:** Europe

**Dates Last Searched:** December 2004 [Planned Annual Update]

**Time Coverage:** 1980 – Present

**Search Strategy:**

Trial search phrase:

#1 clin\*

#2 trial\*

#3 #1 near #2

#4 singl\*

#5 doubl\*

#6 trebl\*

#7 tripl\*

#8 blind\*

#9 mask\*

#10 (#4 or #5 or #6 or #7) near (#8 or #9)

#11 randomi\*

#12 random\*

#13 allocat\*

#14 assign\*

#15 #12 near (#13 or #14)

#16 crossover

#17 #16 or #15 or #11 or #10 or #3

schizophrenia search phrase:

#1 schizo\*

#2 hebephreni\*

#3 oligophreni\*

#4 psychotic\*

#5 psychosis

#6 psychoses

#7 chronic\*

#8 sever\*  
#9 mental\*  
#10 ill\*  
#11 disorder\*  
#12 ((chronic\* or sever\*) near2 mental\*) near2 (ill\* or disorder\*)  
#13 #1 or #2 or #3 or #4 or #5 or #6 or #12  
#14 tardiv\*  
#15 dyskine\*  
#16 tardiv\* near dyskine\*  
#17 akathisi\*  
#18 acathisi\*  
#19 neuroleptic\*  
#20 malignant  
#21 syndrome  
#22 neuroleptic\* and (malignant near2 syndrome)  
#23 movement  
#24 disorder\*  
#25 #19 and movement and disorder\*  
#26 parkinsoni\*  
#27 neuroleptic-induc\*  
#28 parkinson's  
#29 disease  
#30 parkinson's near1 (disease in ti)  
#31 #16 or #17 or #18 or #22 or #25 or #26 or #27  
#32 #31 not #30  
#33 #32 or #13

### **SocioFile [Now Sociological Abstracts]**

**Host:** ProQuest

**URL:** <http://search.proquest.com/>

**Dates Last Searched:** September 11, 2007 [Planned Annual Update]

**Time Coverage:** 1973 – Present

#### **Search Strategy:**

Trial search phrase:

#1 randomi\*  
#2 clin\*  
#3 trial\*  
#4 clin\* near trial\*  
#5 singl\*  
#6 doubl\*  
#7 tripl\*  
#8 trebl\*  
#9 mask\*  
#10 blind\*  
#11 (singl\* or doubl\* or tripl\* or trebl\*) and (mask\* or blind\*)  
#12 crossover  
#13 random\*  
#14 allocate\*  
#15 assign\*  
#16 random\* near (allocate\* or assign\*)  
#17 #16 or #12 or #11 or #4 or #1  
schizophrenia search phrase:  
#1 explode "schizophrenia"  
#2 explode "psychosis"  
#3 schizo\*

#4 psychosis  
#5 psychotic\*  
#6 psychoses  
#7 chronic\*  
#8 sever\*  
#9 mental\*  
#10 ill\*  
#11 disorder\*  
#12 (chronic\* or sever\*) and (mental\* and (ill\* or disorder\*))  
#13 oligophreni\*  
#14 hebephreni\*  
#15 #1 or #2 or #3 or #4 or #5 or #6 or #12 or #13 or #14  
#16 tardiv\*  
#17 dyskine\*  
#18 tardiv\* near dyskine\*  
#19 akathisi\*  
#20 acathisi\*  
#21 neuroleptic\*  
#22 malignant  
#23 syndrome  
#24 neuroleptic\* and (malignant near2 syndrome)  
#25 movement  
#26 disorder\*  
#27 #21 and movement and disorder\*  
#28 parkinsoni\*  
#29 neuroleptic-induc\*  
#30 parkinson's  
#31 disease  
#32 parkinson's near1 (disease in ti)  
#33 #18 or #19 or #20 or #24 or #27 or #28 or #29  
#34 #33 not #32  
#35 #34 or #15

#### **Stanley Database**

**URL:** <http://www.stanleyresearch.org/>

**Geographical Coverage:** USA

**Dates Last Searched:** February 2011 [Planned Annual Update]

**Time Coverage:** 1999 – Present

#### **Search Strategy:**

#1 Schizophrenia

#2 psychosis

#3 #1 and #2

#### **STEB: Scientific and Technical Egyptian Bibliographic Database**

**URL:** <http://www.sti.sci.eg/enstinetdatabases.htm>

**Geographical Coverage:** Egypt

**Dates Last Searched:** 2000; October 22, 2015 [Inactive]

**Time Coverage:** Unclear

#### **Search Strategy:**

#1 randomi\$

#2 double-blind

#3 assign\$

#4 allocate\$

#5 #1 or #2 or #3 or #4

**Thai Index Medicus:** ข้อมูลวารสารทางการแพทย์

**URL:** <http://cuml.md.chula.ac.th/index.shtml>

**Geographical Coverage:** Thailand

**Dates Last Searched:** November 2008 [Planned Annual Update]

**Time Coverage:** 1991 – Present

**Search Strategy:**

Search option: All fields

#1 randomi\$

#2 double

#3 blind\$

#4 #2 and #3

#5 random\$

#6 alloc\$

#7 assign\$

#8 สุ่ม\$

#9 เปรียบเทียบ\$

#10 #8 or #9

#11 #10 not #1

**Thai Journal Citation Index Centre:** ศูนย์ดัชนีอ้างอิงวารสารไทย

**URL:** [http://www.kmutt.ac.th/jif/public\\_html/searchp.html](http://www.kmutt.ac.th/jif/public_html/searchp.html)

**Geographical Coverage:** Thailand

**Dates Last Searched:** November 2008 [Planned Annual Update]

**Time Coverage:** 1996 – Present

**Search Strategy:**

#1 randomi

#2 double blind

#3 #1 or #2

**Thai Medical Index:** ข้อมูลวารสารทางการแพทย์

**URL:** <http://www2.medlib.si.mahidol.ac.th/elib/cgi-bin/opacexe.exe?op=gfs&frm=simsch&db=Medindex&skin=su>

**Geographical Coverage:** Thailand

**Dates Last Searched:** March 2007 [Planned Annual Update]

**Time Coverage:** 1990 – Present

**Search Strategy:**

Search option: general keyword

#1 randomi\*

#2 double blind\*

#3 #1 or #2

#4 สุ่ม

#5 #4 NOT #1

#6 #3 or #5

**Thai Research:** ฐานข้อมูลวิจัยไทย

**URL:** <http://www.thairesearch.in.th/>

**Geographical Coverage:** Thailand

**Dates Last Searched:** December 2008; October 22, 2015 [Inactive]

**Time Coverage:** Unclear

**Search Strategy:**

#1 randomized

#2 randomised

#3 double blind



#4 สุขุม

#5 #1 or #2 or #3 or #4

**Thai Thesis online:** วิทยานิพนธ์ไทย

**URL:** <http://thesis.stks.or.th/>

**Geographical Coverage:** Thailand

**Dates Last Searched:** November 2008 [Planned Annual Update]

**Time Coverage:** Unclear – Present

**Search Strategy:**

#1 randomized

#2 double blind

#3 สุขุม

#4 #1 or #2 or #3

**ThaiLis**

**URL:** <http://uc.thailis.or.th/main/index.aspx> and <http://dcms.thailis.or.th/tdc/>

**Geographical Coverage:** Thailand

**Dates Last Searched:** November 2008

**Time Coverage:** 1998 – Present

**Search Strategy:**

Search option: In all universities, all field, in 'some words'

#1 randomi

#2 double blind

#3 #1 or #2

The Cochrane Library

**URL:** <http://www.cochranelibrary.com/>

**Geographical Coverage:** Multi-National

**Dates Last Searched:** September 2012 [Planned Annual Update]

**Time Coverage:** 1995 – Present

**Search Strategy:**

#1 MeSH descriptor Schizophrenia, this term only

#2 MeSH descriptor Paranoid Disorders, this term only

#3 schizo\* in Clinical Trials

#4 hebephreni\* in Clinical Trials

#5 oligophreni\* in Clinical Trials

#6 psychotic\* in Clinical Trials

#7 psychosis in Clinical Trials

#8 psychoses in Clinical Trials

#9 chronic\* in Clinical Trials

#10 sever\* in Clinical Trials

#11 mental\* in Clinical Trials

#12 ill\* in Clinical Trials

#13 disorder\* in Clinical Trials

#14 (#9 OR #10)

#15 (#14 AND #11)

#16 (#12 OR #13)

#17 (#15 AND #16)

#18 (#1 OR #2 OR #3 OR #4 OR #5 OR #6 OR #7 OR #8 OR #17)

#19 tardiv\* in Clinical Trials

#20 dyskine\* in Clinical Trials

#21 (#19 AND #20)

#22 akathisi\* in Clinical Trials

#23 acathisi\* in Clinical Trials

#24 neuroleptic\* in Clinical Trials  
#25 malignant in Clinical Trials  
#26 syndrome in Clinical Trials  
#27 (#25 AND #26)  
#28 (#24 AND #27)  
#29 movement in Clinical Trials  
#30 disorder\* in Clinical Trials  
#31 (#24 AND #29 AND #30)  
#32 parkinsoni\* in Clinical Trials  
#33 neuroleptic-induc\* in Clinical Trials  
#34 parkinson's in Clinical Trials  
#35 disease in Clinical Trials  
#36 disease:ti in Clinical Trials  
#37 (#34 AND #36)  
#38 (#21 OR #22 OR #23 OR #28 OR #31 OR #32 OR #33)  
#39 (#38 AND NOT #37)  
#40 MeSH descriptor Dyskinesia, Drug-Induced, this term only  
#41 MeSH descriptor Akathisia, Drug-Induced, this term only  
#42 MeSH descriptor Neuroleptic Malignant Syndrome, this term only  
#43 (#39 OR #40 OR #41 OR #42)  
#44 (#43 OR #18)  
#45 MeSH descriptor Schizophrenia and Disorders with Psychotic Features, this term only  
#46 (#45 OR #44)

**The Thailand Research Fund's Collection:** สำนักงานกองทุนสนับสนุนการวิจัย

**URL:** <http://elibrary.trf.or.th/default.asp>

**Geographical Coverage:** Thailand

**Dates Last Searched:** November 2008 [Planned Annual Update]

**Time Coverage:** Unclear – Present

**Search Strategy:**

#1 randomized

#2 randomised

#3 double-blind

#4 สุ่ม

#5 #1 or #2 or #3 or #4

**UKCRN Portfolio Database**

**URL:** <http://public.ukcrn.org.uk/search/>

**Geographical Coverage:** UK

**Dates Last Searched:** January 22, 2014 [Now Not Getting Updated]

**Time Coverage:** Unclear – Present

**Search Strategy:**

Select Mental Health

**Web of Science**

**Host:** Web of Knowledge

**URL:** <http://isiknowledge.com/>

**Geographical Coverage:** Multi-National [Focused on English-Speaking World]

**Dates Last Searched:** December 01, 2010 [Planned Annual Update]

**Time Coverage:** 1900 – Present

**Search Strategy:**

# 1 Topic=(schizo\*) OR Title=(schizo\*)

# 2 Topic=(psychosis\*) OR Title=(psychosis\*)

# 3 Topic=(psychotic\*) OR Title=(psychotic\*)

# 4 Topic=(psychoses\*) OR Title=(psychoses\*)  
 # 5 Topic=(oligophreni\*) OR Title=(oligophreni\*)  
 # 6 Topic=(hebephreni\*) OR Title=(hebephreni\*)  
 # 7 Topic=(tardiv\*) OR Title=(tardiv\*)  
 # 8 Topic=(dyskine\*) OR Title=(dyskine\*)  
 # 9 #8 AND #7  
 # 10 Topic=(akathisi\*) OR Title=(akathisi\*)  
 # 11 Topic=(acathisi\*) OR Title=(acathisi\*)  
 # 12 Topic=(neuroleptic malignant syndrome\*) OR Title=(neuroleptic malignant syndrome\*)  
 # 13 Topic=(severe mental illness\*) OR Title=(severe mental illness\*)  
 # 14 Topic=(chronic mental illness\*) OR Title=(chronic mental illness\*)  
 # 15 Topic=(chronic mental disorder\*) OR Title=(chronic mental disorder\*)  
 # 16 Topic=(severe mental disorder\*) OR Title=(severe mental disorder\*)  
 # 17 Topic=(neuroleptic-induc\*) OR Title=(neuroleptic-induc\*)  
 # 18 Topic=(parkinson's disease) OR Title=(parkinson's disease)  
 # 19 #17 OR #16 OR #15 OR #14 OR #13 OR #12 OR #11 OR #10 OR #9 OR #6 OR #5 OR #4 OR  
 #3 OR #2 OR #1  
 # 20 #19 NOT #18  
 # 21 Topic=(randomi\*) OR Title=(randomi\*)  
 # 22 Topic=(clin\*) OR Title=(clin\*)  
 # 23 Topic=(trial\*) OR Title=(trial\*)  
 # 24 #23 AND #22  
 # 25 TS=(singl\* OR Doubl\* OR Tripl\* OR Trebl\*) OR TI=(singl\* OR Doubl\* OR Tripl\* OR Trebl\*)  
 # 26 TS=(mask\* OR blind\*) OR TI=(mask\* OR blind\*)  
 # 27 TS=crossover\* OR TI=crossover\*  
 # 28 TS=(allocate\* OR assign\*) OR TI=(allocate\* OR assign\*)  
 # 29 TS=random\* OR TI=random\*  
 # 30 #29 AND #28  
 # 31 #30 OR #27 OR #26 OR #25 OR #24 OR #21  
 # 32 #31 AND #20

### **WHO International Clinical Trials Registry Platform (ICTRP)**

**Host:** WHO

**URL:** <http://apps.who.int/trialsearch/AdvSearch.aspx>

**Geographical Coverage:** Multi-National

**Dates Last Searched:** October 22, 2015 [Regular Monthly Updates]

**Time Coverage:** 2000 – Present

**Note:** This sources includes 16 clinical trial registries.

#### **Search Strategy:**

Recruitment status is ALL

Schizophrenia OR Schizotypal OR Schizoaffective OR Schizophreniform OR Psychosis OR  
 Psychoses OR Psychotic OR Tardive OR Dyskinesia OR Akathisia

### **WHO Representative to Thailand Library: Office of the WHO Representative to Thailand Library**

**URL:** Unclear

**Geographical Coverage:** Thailand

**Dates Last Searched:** November 2008

**Time Coverage:** Unclear

#### **Search Strategy:**

#1 randomized

#2 randomised

#3 double-blind

#4 ฤๅ

#5 #1 or #2 or #3 or #4

**WHO: EMRO Virtual Health Sciences Library**

**URL:** <http://www.emro.who.int/entity/information-resources/index.html>

**Dates Last Searched:** 2005 [Planned Annual Update]

**Time Coverage:** Unclear – Present

**Search Strategy:**

#1 randomly

#2 randomi\$

#3 allocat\$

#4 assign\$

#5 placebo

#6 double-blind\$

#7 double

#8 blind

#9 #7 or #8

#10 #1 or #2 or #3 or #4 or #5 or #6 or #9

**Conference Proceedings**

Conference proceedings are searched using a combination of hand searching and electronic searches. Where proceedings are supplied in electronic form these are searched using the following search phrase:

#1 RANDOMI\*

#2 RANDOMLY

#3 (RANDOM\* AND ALLOC\*)

#4 CROSSOVER

#5 ((SINGL\* or DOUBL\* or TRIPL\* or TREBL\*) and (BLIND\* or MASK\*))

#6 (CLIN\* AND TRIAL\*)

#7 META-ANALYSIS

#8 (PLACEBO\* AND CONTROL\*)]

#9 #1 or #2 or #3 or #4 or #5 or #6 or #7 or #8

The results of electronic searches are then hand searched. All reports likely to relate to a trial relevant to the scope of the Group are obtained and added to the Group's Register. All other trials are forwarded to the Cochrane Central Register of Controlled Trials (formerly known as the Cochrane Controlled Trials Register).

**List of Proceedings**

Annual Congress of the International Society of Psychoneuroendocrinology

25th Annual Congress; 1994 Aug 14-18; Seattle, Washington, USA

30th Annual Congress; 1999 Jul 30 - Aug 3; Orlando, Florida, USA

Annual Meeting of the College of Psychiatric and Neurologic Pharmacists

2nd Annual Meeting; 1999 Mar 25-28; Lake Tahoe, California, USA

Annual Meeting of the International Society of Technology Assessment in Health Care

12th Annual Meeting; 1996 Jun 23-26; San Francisco, California USA

18th Annual Meeting; 2002 Jun 9-12; Berlin, Germany

Annual Meeting of the New Clinical Drug Evaluation Unit

21st Annual Meeting; 1981 May 26-28; Key Biscane, Florida, USA

Annual Meeting of the Society for Neuroscience

27th Annual Meeting; 1997 Oct 25-30; New Orleans, Louisiana, USA

30th Annual Meeting; 2000 Nov 4-9; New Orleans, Louisiana, USA

31st Annual Meeting; 2001 Nov 10-15; San Diego, California, USA

Annual Meeting of the Society for Research on Nicotine and Tobacco

6th Annual Meeting; 2000 Feb 18-20; Arlington, Virginia, USA

9th Annual Meeting; 2003 Feb 19-22; New Orleans, Louisiana, USA

10th Annual Meeting; 2004 Feb 18-21; Phoenix, Arizona, USA

Collegium Internationale Neuro-Psychopharmacologicum Regional Meeting  
 1997 Aug 21-23; Acapulco, Mexico  
 Congres de Neuropsychopharmacologie  
 9th Congres - Nouveaux Developpements du Sulpiride; 1974 Jul 10; Paris, France  
 Congres de Psychiatrie et de Neurologie de Langue Francaise  
 86th Congres; 1988 Jun 13-17; Chambéry, France  
 96th Congres; 1998 May 10-15; Saint Paul, France  
 International Congress of Endocrinology  
 9th International Congress; 1992 Aug 30 - Sep 5; Nice, France  
 International Risperidone Investigators' Meeting  
 1st International Risperidone Investigators' Meeting; 1992 Mar 9-10; Paris, France  
 International Symposium for the Psychological Treatment of Schizophrenia and other Psychoses  
 13th International Symposium; 2000 Jun 5-9; Stavanger, Norway  
 International Workshop on Brain Uptake and Utilization of Fatty Acids  
 2000 Mar 2-4; Bethesda, Maryland, USA  
 Keio University International Symposia for Life Sciences and Medicine on Comprehensive Treatment  
 of Schizophrenia  
 8th Keio University International Symposia - Linking Neurobehavioural Findings to Psychosocial  
 Approaches; 2000 Jun 5-7; Tokyo, Japan  
 Symposium der Arbeitsgemeinschaft fuer Neuropsychopharmakologie und Pharmakopsychiatrie  
 1981; Nuernberg, Germany  
 Treatment-resistant schizophrenia and beyond: current concepts and future prospects  
 1998 Jul 8-9; London, UK

### **Hand Searching**

Acta Psychiatrica Scandinavica - Start: 1948 Last year done: 2008 Ongoing: yes  
 Acta Psychiatrica Scandinavica Supplementum - Start: 1948 Last year done: 2008 Ongoing: yes  
 American Journal of Psychiatry - Start: 1948 Last year done: 2008 Ongoing: yes  
 Arab Journal of Psychiatry - Start: 1990 Last year done: 1997 Ongoing: no  
 Archives of General Psychiatry - Start: 1959 Last year done: 2008 Ongoing: no  
 Australian and New Zealand Journal of Psychiatry - Start: 1967 Last year done: Ongoing: no  
 Behaviour Therapy - Start: 1971 Last year done: 1976, 1981, 1986, 1991 Ongoing: no  
 Biological Psychiatry - Start: 1994 Last year done: 1995 Ongoing: no  
 British Journal of Psychiatry - Start: 1963 Last year done: 2008 Ongoing: yes  
 Canadian Journal of Psychiatry - Start: 1979 Last year done: Ongoing: no  
 Canadian Psychiatric Association Journal (continued as Canadian Journal of Psychiatry - Start: 1956  
 Last year done: 1978 Ongoing: no  
 Clinical Pharmacology and Therapeutics - Start: 1971 Last year done: 1976, 1981, 1986, 1991  
 Ongoing: no  
 Clinical Schizophrenia and Related Psychoses – Start: 2008 Last year done 2015 Ongoing: yes  
 Der Nervenarzt - Start: 1980 Last year done: 1995 Ongoing: no  
 Egyptian Journal of Mental Health - Start: 1988 Last year done: 1990-1992 Ongoing: no  
 Egyptian Journal of Psychiatry - Start: 1978 Last year done: 1983, 1986, 1988-89 Ongoing: no  
 Hospital and Community Psychiatry (continued as Psychiatric Services) - Start: 1966 Last year done:  
 1994 Ongoing: no  
 Journal of Consulting and Clinical Psychology - Start: 1980 Last year done: 1995 Ongoing: no  
 Journal of Intellectual Disability Research - Start: 1992 Last year done: 2000 Ongoing: no  
 Journal of Mental Deficiency Research (continued as Journal of Intellectual Disability Research) -  
 Start: 1958 Last year done: 1991 Ongoing: no  
 Journal of Mental Science (continued as British Journal of Psychiatry) - Start: 1948 Last year done:  
 1962 Ongoing: no  
 Journal of Nervous and Mental Disease - Start: 1948 Last year done: 1993 Ongoing: no  
 Korean Journal of Schizophrenia Research – Ongoing yes  
 Pakistan Journal of Clinical Psychiatry - Start: 1991 Last year done: Ongoing: no  
 Polish Journal of Psychiatry - Start: 1980 Last year done: 1994 Ongoing: no

Psychiatria Fennica - Start: 1970 Last year done: Ongoing: no  
Psychiatric Services - Start: 1995 Last year done: Ongoing: no  
Psychological Medicine - Start: 1970 Last year done: 1997 Ongoing: no  
Psychosis – Start: 2009 Last year done 2015 Ongoing: yes  
Psychosomatic Medicine - Start: 1971 Last year done: 1976, 1981, 1986, 1991 Ongoing: no  
Schizophrenia Bulletin - Start: 1969 Last year done: 2008 Ongoing: yes  
Schizophrenia Frontier – Ongoing: yes  
Schizophrenia Research - Start: 1988 Last year done: 2008 Ongoing: yes  
The following journals have been/are being searched and relevant trials are entered into the Register:  
Zhurnal Nevropatologii I Psikhiatrii Imeni SS Korsakov - Start: 1980 Last year done: 1995 Ongoing:  
no

### **Additional Search Strategies**

**Citation Searching:** This can be undertaken either electronically or manually. The methods by which reports are selected for citation searching are made explicit and reproducible.

**Personal Contact:** The methods by which individuals were selected for contact are made explicit and reproducible.

**Pharmaceutical Industry:** The methods by which companies are selected for contact and, in turn, how they select material for the review are made explicit and reproducible. It is important that pharmaceutical companies are not contacted directly but through the editorial base. CSG works to foster good relationships with pharmaceutical companies in an attempt to obtain the largest dataset possible. Individual approaches may lead to rejection, duplication of effort and the perception that CSG's efforts are ill-coordinated.
